# Supplementary material for: Diesel soot oxidation over Mn–Pr–Ce oxide catalysts: structural changes and the impact of Mn doping
Source: Royal Society of Chemistry journal article supplement (doi:10.1039/d4ma00968a), 2025-01-01
Supplement: d4ma00968a1.pdf [file d4ma00968a1.pdf]

# **Diesel soot oxidation over Mn-Pr-Ce oxide catalysts: structural changes and the impact of Mn doping**

**Sunaina S Patil<sup>1</sup>, Hari Prasad Dasari<sup>1\*</sup>, Rahulkumar Shirasangi<sup>1</sup>,**

**Harshini Dasari<sup>2\*\*</sup>**

<sup>1</sup>Energy and Catalysis Materials Laboratory, Chemical Engineering Department,  
National Institute of Technology Karnataka, Surathkal, Mangalore-575025, Karnataka, India

<sup>2</sup>Chemical Engineering Department, Manipal Institute of Technology  
Manipal Academy of Higher Education, Manipal-576104, Udupi, Karnataka, India

# S1. FWO plots for $\text{Mn}_{x(x=0-0.2)} (\text{Ce}_{0.9}\text{Pr}_{0.1})_{1-x} \text{O}_{2-\delta}$ catalysts

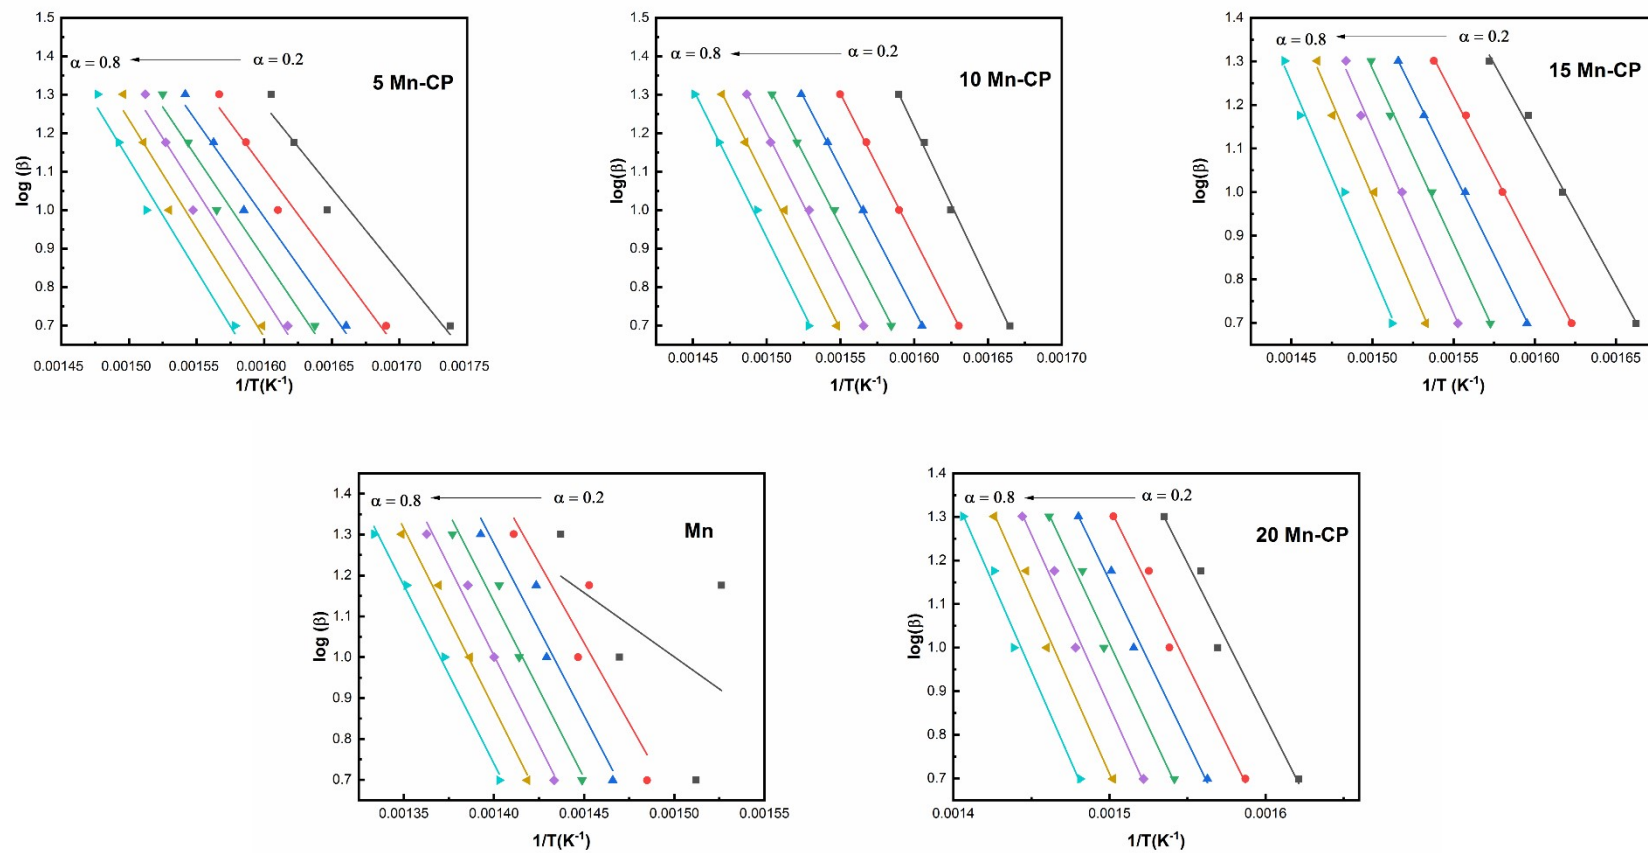

Figure S1 : Flynn Wall Ozawa (FWO) plots for  $\text{Mn}_{x(x=0-0.2)} (\text{Ce}_{0.9}\text{Pr}_{0.1})_{1-x} \text{O}_{2-\delta}$  catalyst
